# Supplementary material for: Structural investigation of ternary PdRuM (M = Pt, Rh, or Ir) nanoparticles using first-principles calculations
Source: Royal Society of Chemistry journal article supplement (doi:10.1039/d0ra01661f), 2020-01-01
Supplement: d0ra01661f1.pdf [file d0ra01661f1.pdf]

# Structural Investigation of the Ternary PdRuM (M=Pt, Rh, or Ir) Nanoparticles Using First-Principles Calculations

Shih-Hsuan Hung,\* Hiroshi Akiba,\* Osamu Yamamuro,\* and Taisuke Ozaki\*

*The Institute for Solid State Physics, The University of Tokyo, Kashiwanoha, Kashiwa,  
Chiba 277-8581 Japan*

E-mail: sh1635@issp.u-tokyo.ac.jp; h-akiba@issp.u-tokyo.ac.jp; yamamuro@issp.u-tokyo.ac.jp;  
t-ozaki@issp.u-tokyo.ac.jp

## 1 Additional Figures and Tables

Table S 1: Formation energy of pure NPs in three shapes. The formation energy of the Pd NP in tOh<sub>55</sub> shape is missing. Since the particular NP is unstable and transforms into the Ih shape.

|                   | $E_f$ (eV/atom) |      |      |      |      |
|-------------------|-----------------|------|------|------|------|
|                   | Pd              | Ru   | Pt   | Rh   | Ir   |
| hcp <sub>57</sub> | 0.91            | 1.57 | 1.06 | 1.29 | 1.58 |
| tOh <sub>55</sub> | –               | 1.64 | 1.09 | 1.31 | 1.63 |
| Ih <sub>55</sub>  | 0.91            | 1.61 | 1.6  | 1.28 | 1.59 |

Table S 2: Comparison of oxygen adsorption energies between fcc (111) and hcp ( $10\bar{1}1$ ) surfaces. The adsorption sites are both on 3-fold fcc site.

|                                                 | $E_{\text{ads}}$ (eV/atom) |       |       |       |       |
|-------------------------------------------------|----------------------------|-------|-------|-------|-------|
|                                                 | Pd                         | Ru    | Pt    | Rh    | Ir    |
| 3-fold fcc site on fcc (111) surface            | -1.93                      | -3.21 | -1.81 | -2.68 | -2.65 |
| 3-fold fcc site on hcp ( $10\bar{1}1$ ) surface | -2.06                      | -3.65 | -1.84 | -2.78 | -2.47 |

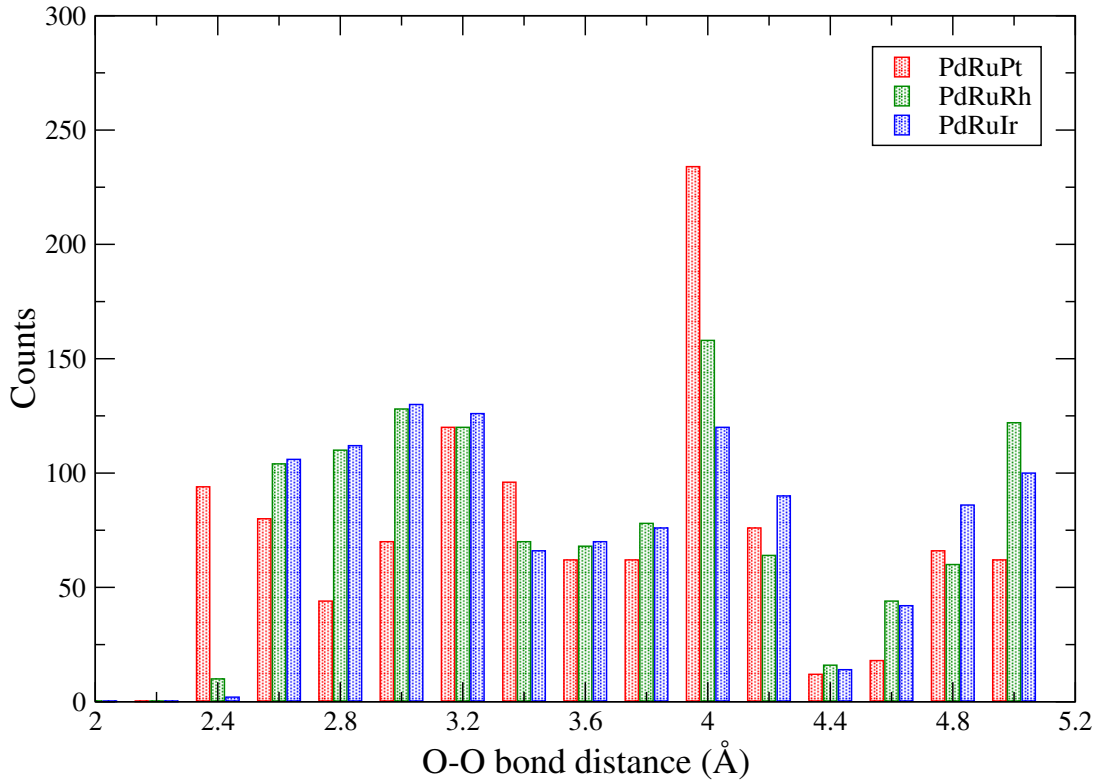

Figure S 1: The O-O bond length distribution with regard to oxidized ternary PdRuPt, PdRuRh, and PdRuIr NPs. The statistic of individual ternary NP includes NPs with hcp, tOh and Ih shapes.
